# Supplementary material
Source: PubMed Central journal article supplement (PMC6661074)

Extended Data Fig.3d

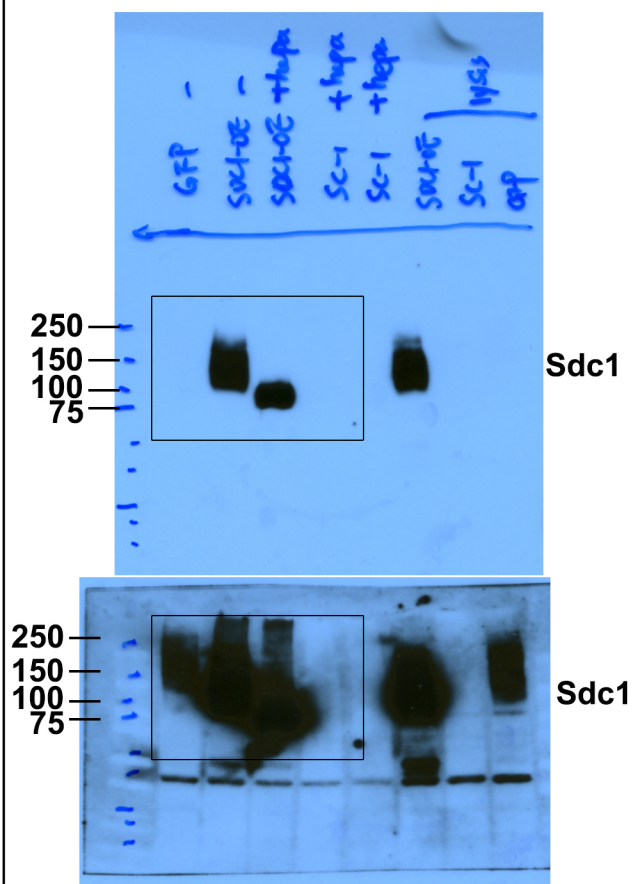

Extended Data Fig.3e

Vinculin (Loading control) was run on the same gel

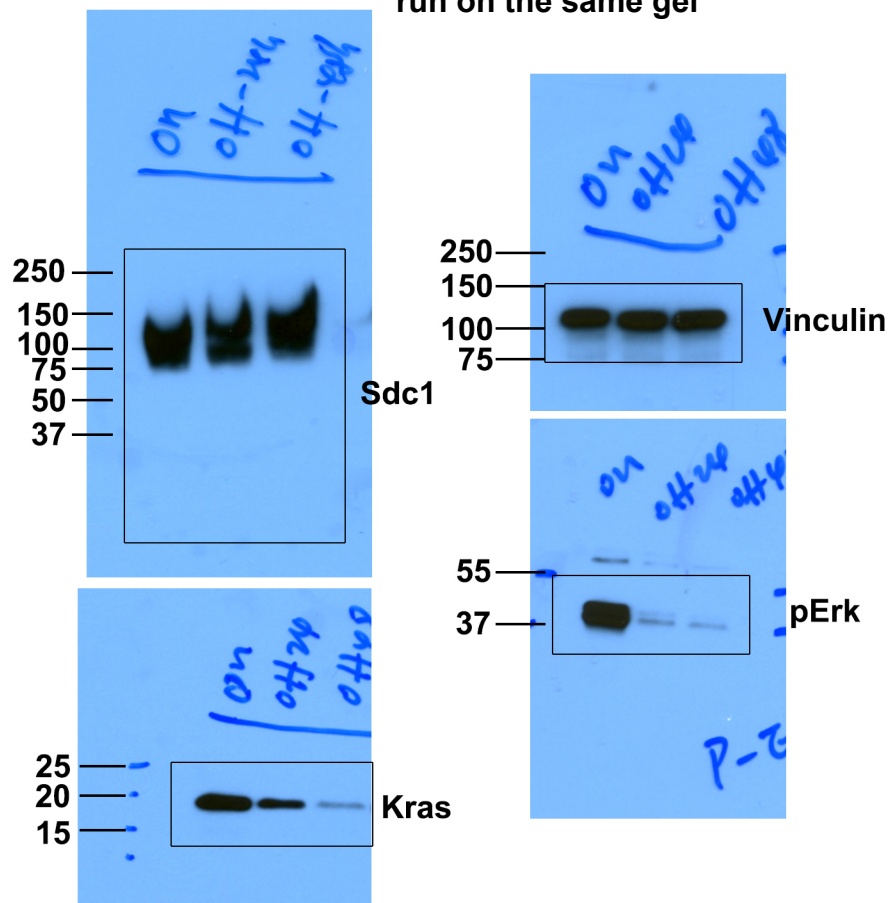

Extended Data Fig.6b

Vinculin (Loading control) was run on the same gel

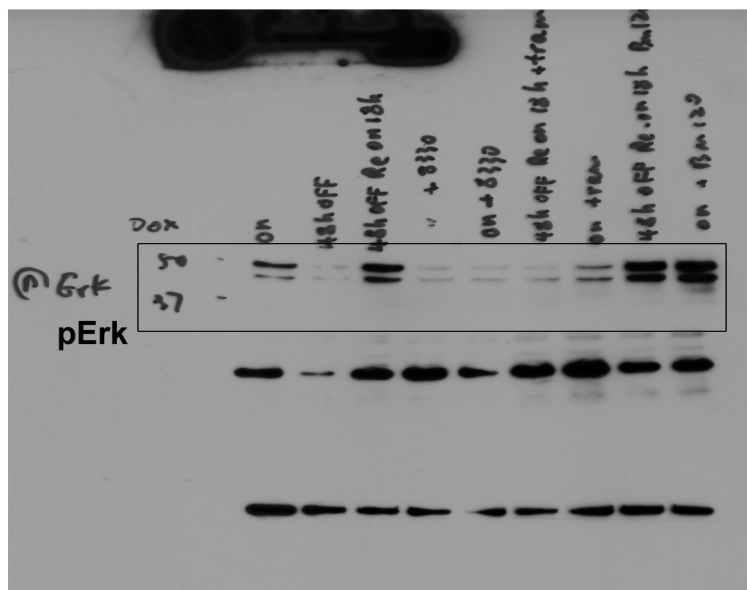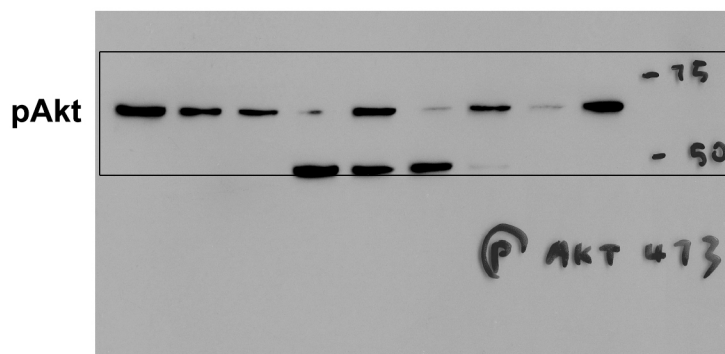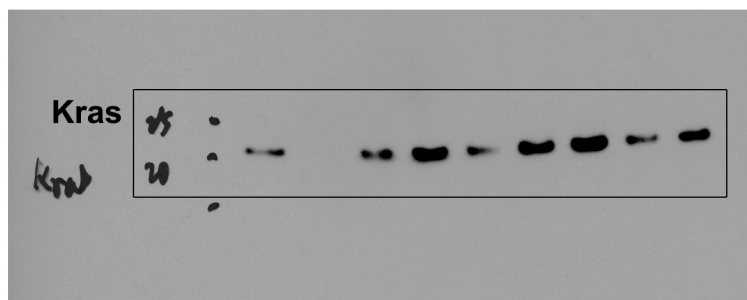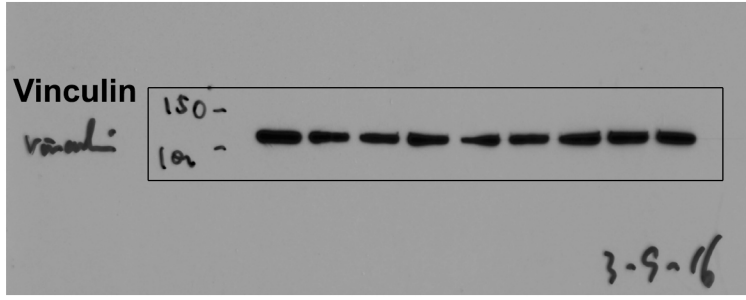

3-9-16

Extended Data Fig.6d Vinculin (Loading control) was run on the same gel

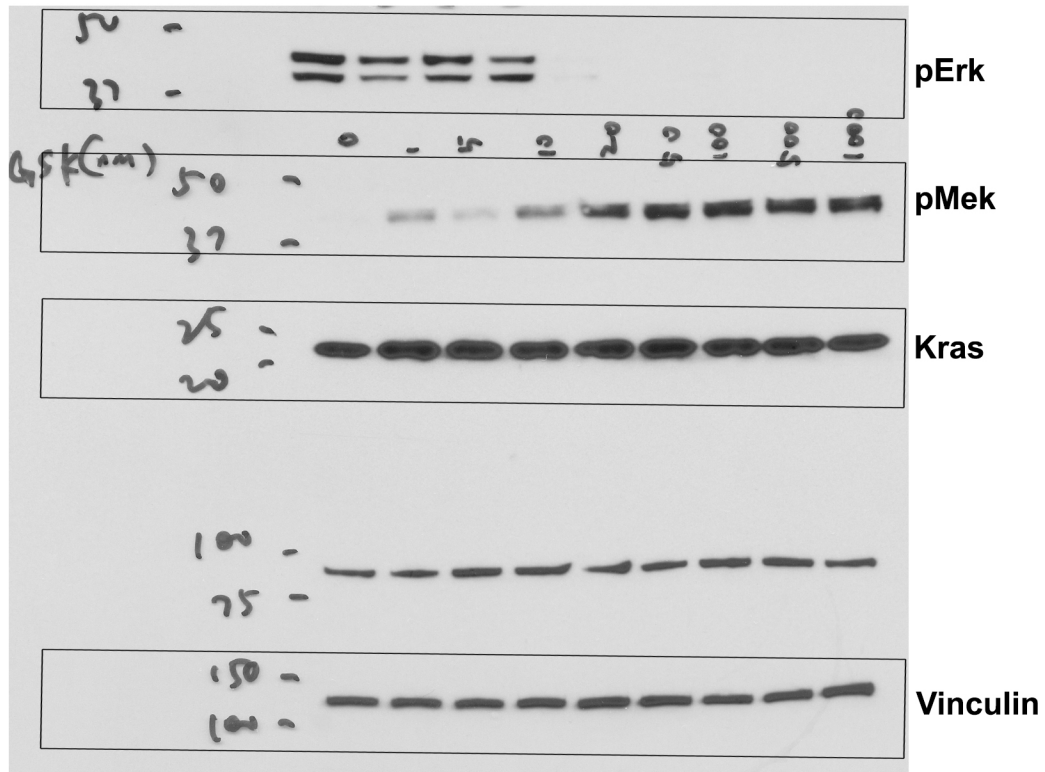

Extended Data Fig.6f Vinculin (Loading control) was run on the same gel

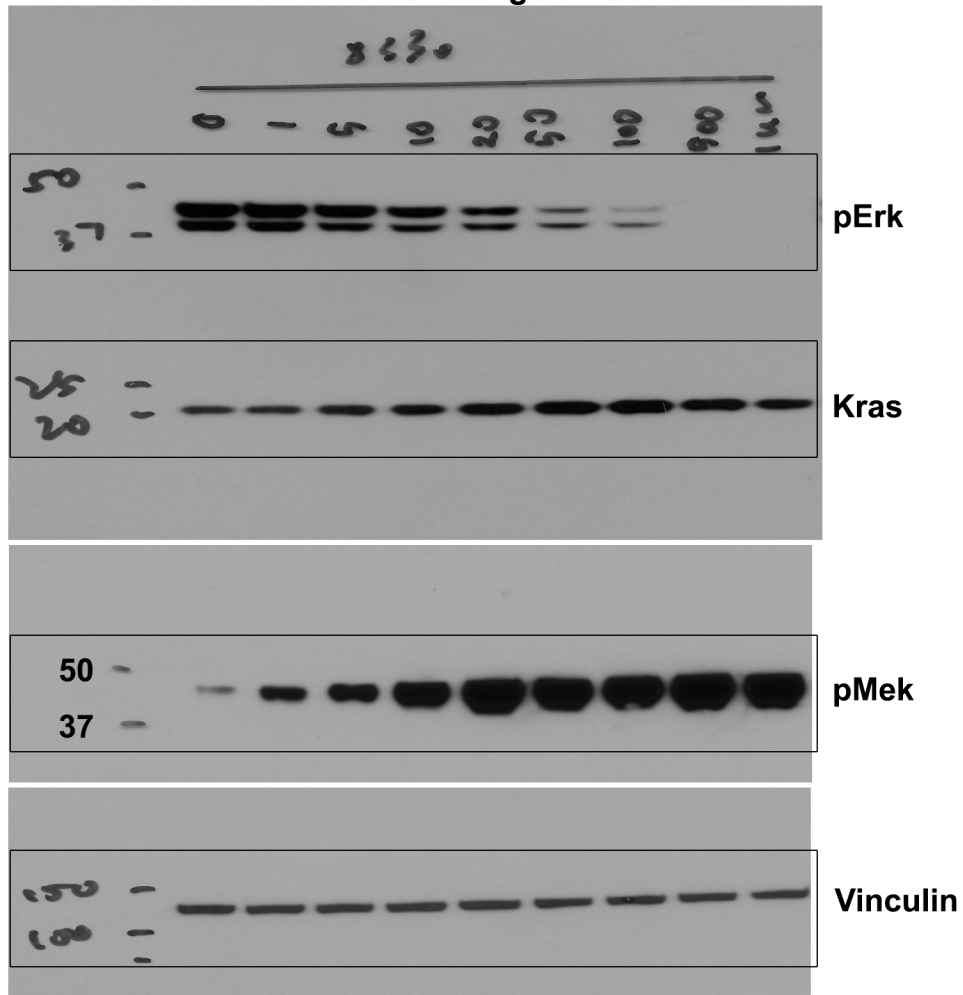

Extended Data Fig.7a

Vinculin (Loading control) was run on the same gel

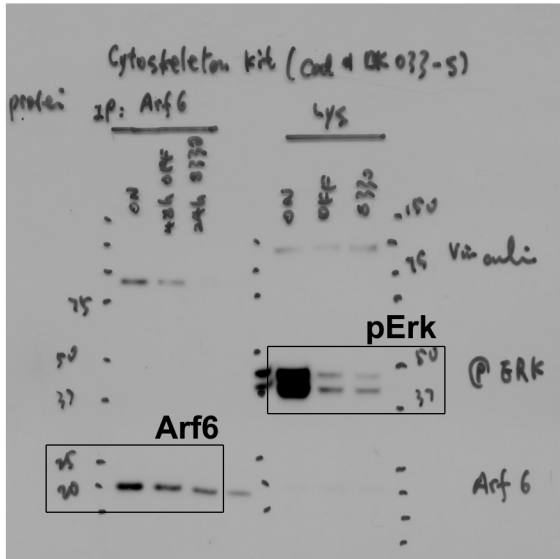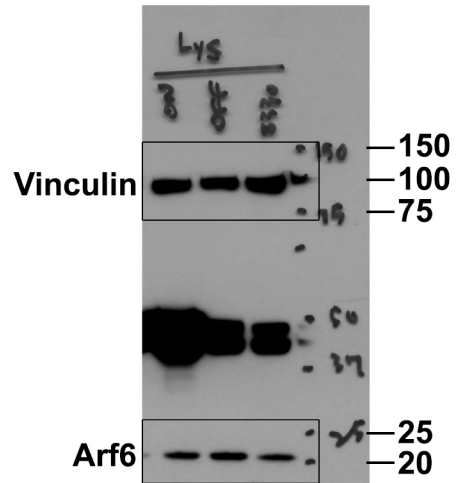

Actin (processing control of the same samples) was run on separate gel

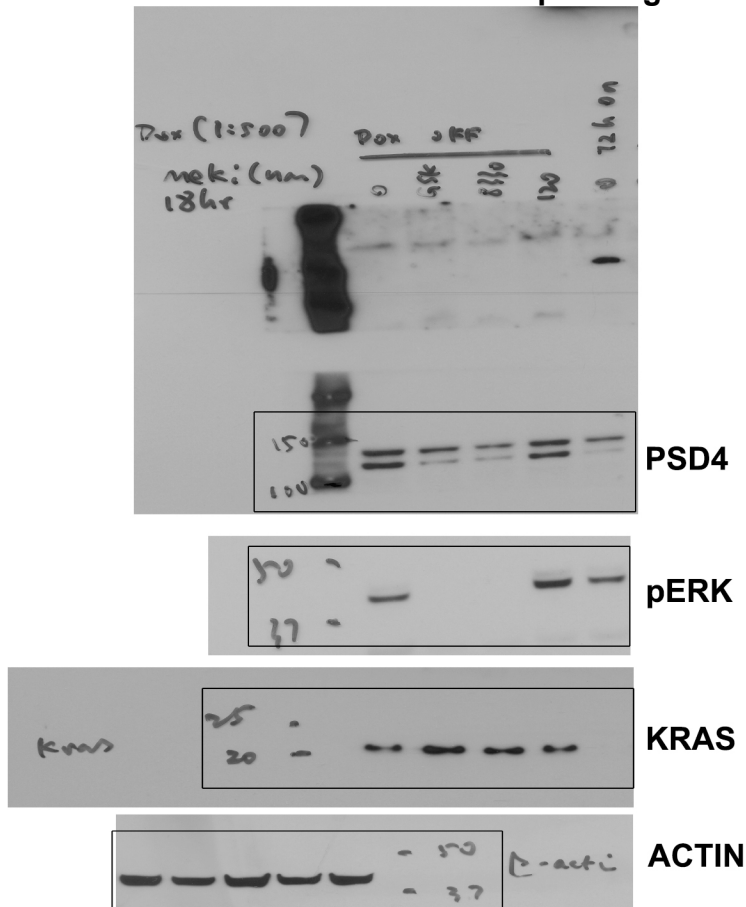

Extended Data Fig.7i Vinculin (processing control of the same samples) was run on separate gel

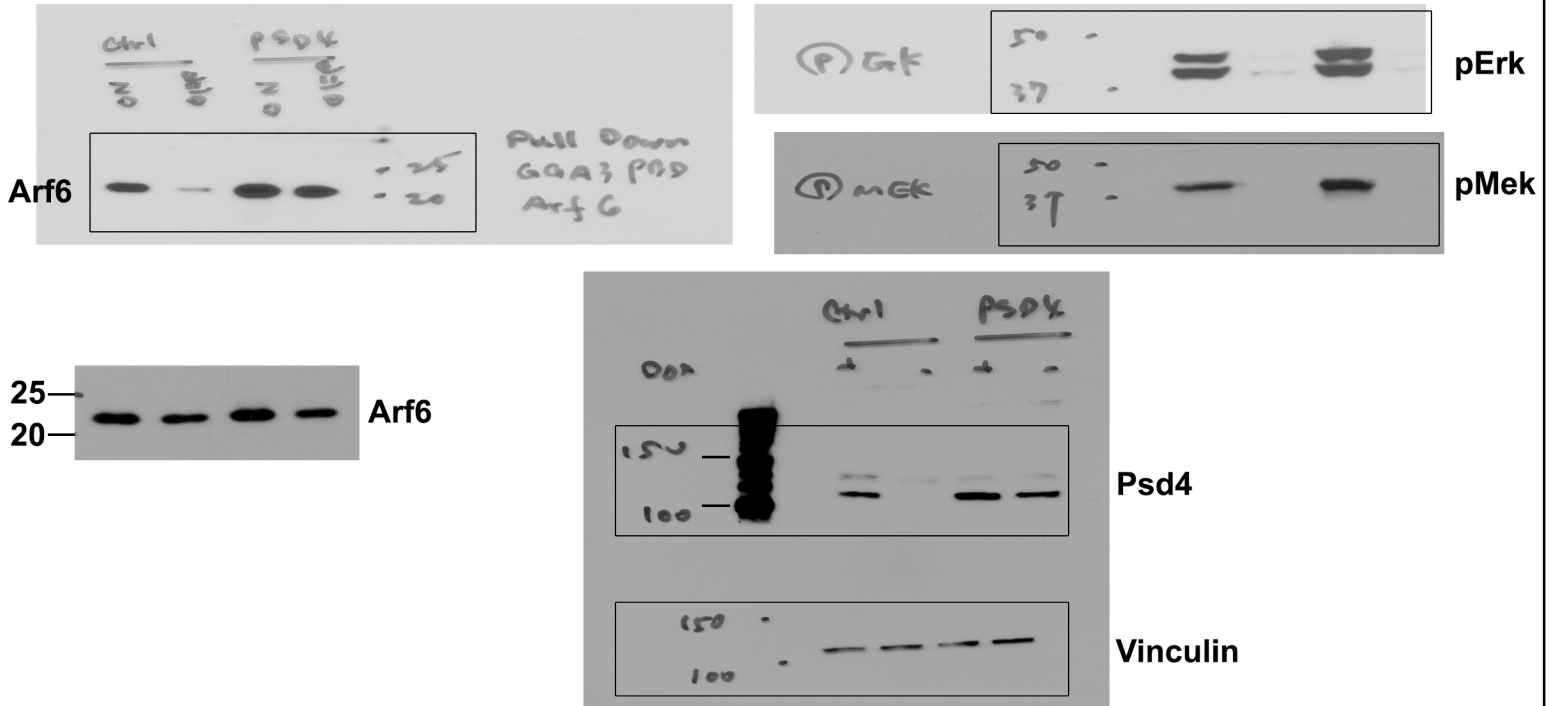

Extended Data Fig.9h Vinculin (Loading control) was run on the same gel

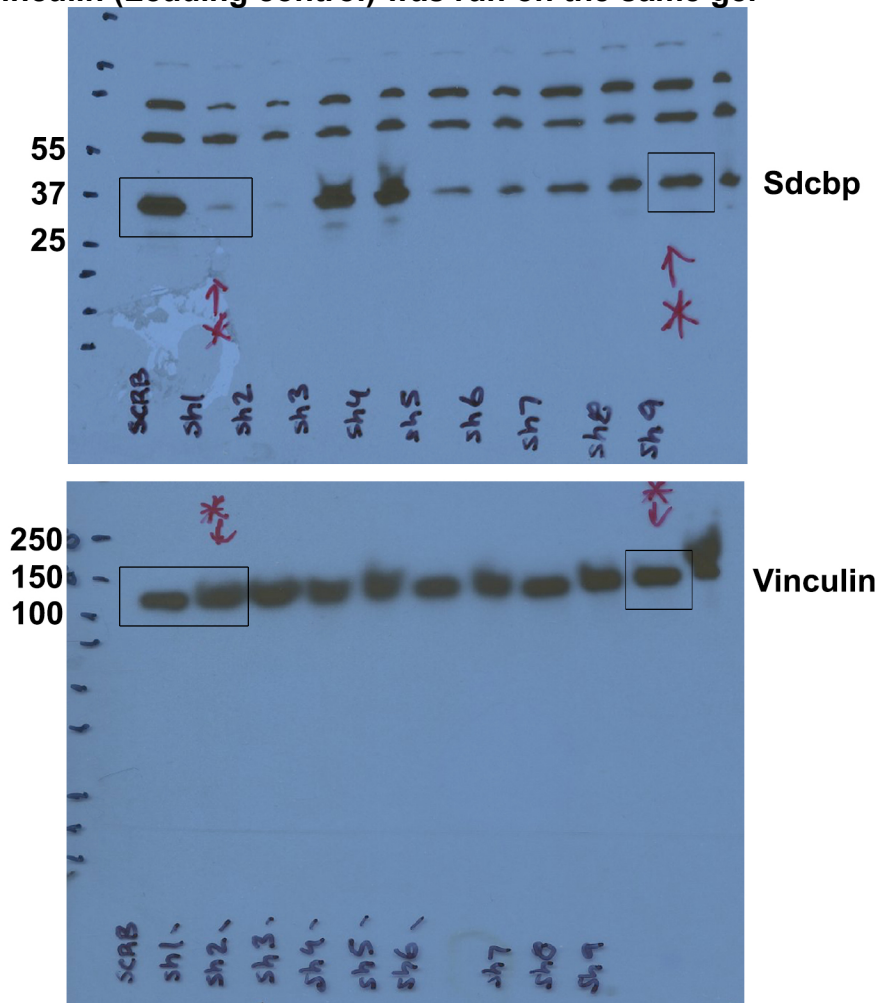

Supplement: NIHMS1521222-supplement-Westernblot_Raw_Data.pdf [file NIHMS1521222-supplement-Westernblot_Raw_Data.pdf]
