# Supplementary material
Source: PubMed Central journal article supplement (PMC6661074)
Supplement: NIHMS1521222-supplement-Dataset_1.pdf [file NIHMS1521222-supplement-Dataset_1.pdf]

Supplementary Table1 Kras up-regulated surfaceome gene list

| Accession | Gene     | Description                                                             | AK10965           | AK192 | AK196 | AK10965 | AK192 | AK196 | Human <sup>a</sup> |
|-----------|----------|-------------------------------------------------------------------------|-------------------|-------|-------|---------|-------|-------|--------------------|
|           |          |                                                                         | Ratio_KRAS ON/OFF |       |       | MSEvent |       |       |                    |
| O35598    | Adam10   | Disintegrin and metalloproteinase domain-containing protein 10          | 1.591             | 1.239 | 2.121 | 115     | 1126  | 544   | Y                  |
| Q61072    | Adam9    | Disintegrin and metalloproteinase domain-containing protein 9           | 2.273             | 1.167 | 2.729 | 8       | 362   | 112   | Y                  |
| E9Q3Q6    | Alcam    | CD166 antigen                                                           | 2.291             | 1.008 | 2.303 | 507     | 2377  | 1497  | Y                  |
| Q9JH22    | Ankh     | Progressive ankylosis protein                                           | 1.241             | 1.125 | 2.16  | 15      | 104   | 44    | N                  |
| Q9CZ52    | Antxr1   | Anthrax toxin receptor 1                                                | .                 | 1.356 | 2.159 | .       | 116   | 24    | N                  |
| Q6DFX2    | Antxr2   | Anthrax toxin receptor 2                                                | 1.964             | 1.513 | 2.585 | 14      | 405   | 70    | Y                  |
| P10107    | Anxa1    | Annexin A1                                                              | 0.915             | 1.4   | 2.303 | 33      | 146   | 139   | N                  |
| P97429    | Anxa4    | Annexin A4                                                              | 0.604             | 1.826 | 3.649 | 41      | 95    | 119   | N                  |
| P48036    | Anxa5    | Annexin A5                                                              | 0.857             | 1.545 | 2.997 | 168     | 166   | 159   | N                  |
| O35640    | Anxa8    | Annexin A8                                                              | 0.864             | 1.699 | 1.788 | 12      | 18    | 37    | N                  |
| Q3U128    | Apcdd1   | Protein APCDD1                                                          | .                 | 1.852 | 1.824 | .       | 32    | 2     | N                  |
| P12023    | App      | Isoform APP695 of Amyloid beta A4 protein                               | 1.433             | .     | 1.443 | 3       | .     | 12    | Y                  |
| Q8VDN2    | Atp1a1   | Sodium/potassium-transporting ATPase subunit alpha-1                    | 1.383             | 1.022 | 1.497 | 237     | 491   | 334   | Y                  |
| P97370    | Atp1b3   | Sodium/potassium-transporting ATPase subunit beta-3                     | 1.363             | 1.187 | 1.897 | 29      | 409   | 62    | Y                  |
| Q6PE80    | Axl      | Axl protein                                                             | 0.77              | 1.347 | 1.861 | 81      | 390   | 97    | Y                  |
| P01887    | B2m      | Beta-2-microglobulin                                                    | 1.477             | 1.159 | 1.513 | 17      | 31    | 59    | N                  |
| A2AVX1    | Bcas1    | Breast carcinoma-amplified sequence 1 homolog                           | .                 | 1.203 | 1.716 | .       | 2     | 3     | N                  |
| O35607    | Bmpr2    | Bone morphogenetic protein receptor type-2                              | .                 | 1.405 | 2.522 | .       | 13    | 82    | N                  |
| O08532    | Cacna2d1 | Isoform 2C of Voltage-dependent calcium channel subunit alpha-2/delta-1 | 1.601             | 1.393 | 1.069 | 77      | 74    | 231   | N                  |
| Q8R5M8    | Cadm1    | Isoform 4 of Cell adhesion molecule 1                                   | 1.696             | 1.15  | 1.982 | 182     | 702   | 254   | Y                  |
| Q8R464    | Cadm4    | Cell adhesion molecule 4                                                | 0.951             | 1.3   | 2.694 | 9       | 48    | 19    | N                  |
| P10810    | Cd14     | Monocyte differentiation antigen CD14                                   | 2.058             | 1.207 | 1.774 | 105     | 314   | 213   | Y                  |
| O35566    | Cd151    | CD151 antigen                                                           | 1.981             | 1.353 | 2.058 | 64      | 145   | 40    | Y                  |
| Q8VE98    | Cd276    | CD276 antigen                                                           | 1.747             | 1.225 | 2.232 | 5       | 36    | 6     | Y                  |
| P56528    | Cd38     | ADP-ribosyl cyclase 1                                                   | .                 | 1.304 | 2.074 | .       | 215   | 204   | N                  |
| Q61735    | Cd47     | Leukocyte surface antigen CD47                                          | 1.725             | 1.273 | 2.008 | 9       | 7     | 4     | N                  |
| P40240    | Cd9      | CD9 antigen                                                             | 1.807             | 1.529 | 2.654 | 11      | 140   | 13    | Y                  |
| Q8VCN6    | Cd99     | CD99 antigen                                                            | 2.746             | 1.443 | 2.98  | 3       | 25    | 2     | Y                  |
| I7HJQ8    | Cd99l2   | CD99 antigen-like protein 2                                             | 1.553             | 1.277 | 2.061 | 56      | 37    | 31    | Y                  |
| P09803    | Cdh1     | Cadherin-1                                                              | 1.361             | 0.995 | 1.587 | 221     | 1744  | 623   | Y                  |
| Q9WTR5    | Cdh13    | Cadherin-13                                                             | 1.741             | 1.096 | 2.27  | 110     | 262   | 252   | N                  |
| Q9R100    | Cdh17    | Cadherin-17                                                             | 6.791             | 0.948 | 1.862 | 231     | 2872  | 948   | Y                  |
| D3YYT0    | Cdh2     | Cadherin-2                                                              | 1.944             | 1.232 | 2     | 229     | 629   | 306   | Y                  |
| Q9QX15    | Ciqa1    | Calcium-activated chloride channel regulator 1                          | .                 | 1.659 | 1.543 | .       | 21    | 14    | N                  |
| O88552    | Cldn2    | Claudin-2                                                               | 4.582             | 1.691 | 1.654 | 2       | 2     | 2     | N                  |
| Q9Z262    | Cldn6    | Claudin-6                                                               | 0.716             | 1.411 | 1.978 | 2       | 18    | 4     | N                  |
| Q9CQX5    | Cldnd1   | Claudin domain-containing protein 1                                     | .                 | 1.516 | 3.074 | .       | 21    | 3     | N                  |
| Q9QXT0    | Cnpy2    | Protein canopy homolog 2                                                | 0.315             | 1.224 | 1.288 | 10      | 72    | 34    | N                  |
| Q80V42    | Cpm      | Carboxypeptidase M                                                      | .                 | 2.08  | 1.983 | .       | 8     | 84    | Y                  |
| Q64735    | Cr1l     | Isoform 2 of Complement component receptor 1-like protein               | 1.629             | 1.404 | 2.05  | 34      | 253   | 88    | N                  |
| P97792    | Cxadr    | Coxsackievirus and adenovirus receptor homolog                          | 1.845             | 1.018 | 1.405 | 222     | 691   | 446   | Y                  |
| Q62165    | Dag1     | Dystroglycan                                                            | 1.432             | 0.974 | 2.188 | 214     | 449   | 394   | Y                  |
| Q91ZV3    | Dcbld2   | Discoidin, CUB and LCCL domain-containing protein 2                     | 3.848             | 1.113 | 2.228 | 3       | 183   | 21    | Y                  |
| Q03146    | Ddr1     | Epithelial discoidin domain-containing receptor 1                       | .                 | 1.69  | 3.169 | .       | 78    | 52    | Y                  |
| P97465    | Dok1     | Docking protein 1                                                       | .                 | 1.301 | 1.753 | .       | 3     | 2     | N                  |
| Q8C255    | Dpep2    | Dipeptidase 2                                                           | .                 | 2.331 | 3.377 | .       | 5     | 11    | N                  |
| P55292    | Dsc2     | Isoform 2B of Desmocollin-2                                             | .                 | 1.281 | 2.614 | .       | 23    | 5     | Y                  |
| Q4PZA2    | Ece1     | Isoform C of Endothelin-converting enzyme 1                             | 1.043             | 1.378 | 2.038 | 9       | 9     | 43    | Y                  |
| O08543    | Efna5    | Ephrin-A5                                                               | 2.217             | 1.67  | 2.246 | 3       | 35    | 18    | Y                  |
| P52795    | Efnb1    | Ephrin-B1                                                               | 2.714             | 1.389 | 2.236 | 57      | 461   | 206   | Y                  |
| P52800    | Efnb2    | Ephrin-B2                                                               | 1.315             | 1.486 | 2.141 | 67      | 757   | 328   | Y                  |
| Q01279    | Egrf     | Epidermal growth factor receptor                                        | 1.343             | 2.904 | 3.112 | 50      | 55    | 68    | Y                  |
| Q99JW5    | Epcam    | Epithelial cell adhesion molecule                                       | 1.65              | 0.937 | 1.31  | 16      | 151   | 54    | Y                  |
| Q03145    | Epha2    | Ephrin type-A receptor 2                                                | 2.996             | 1.333 | 3.015 | 53      | 1013  | 515   | Y                  |
| Q61526    | ErbB3    | Receptor tyrosine-protein kinase erbB-3                                 | .                 | 1.403 | 2.207 | .       | 14    | 10    | Y                  |
| Q3TZZ7    | Esyf2    | Extended synaptotagmin-2                                                | 1.292             | 0.891 | 1.256 | 10      | 425   | 194   | N                  |
| O88792    | F11r     | Junctional adhesion molecule A                                          | 1.627             | 1.398 | 2.159 | 55      | 601   | 82    | Y                  |
| P20352    | F3       | Tissue factor                                                           | 5.044             | 1.134 | 2.468 | 105     | 815   | 303   | Y                  |
| Q8BGT1    | Flrt3    | Fibronectin leucine rich transmembrane protein 3                        | 1.202             | 1.008 | 1.961 | 45      | 870   | 789   | Y                  |
| O70421    | Fzd1     | Frizzled-1                                                              | 1.245             | 1.364 | 1.741 | 1       | 3     | 3     | N                  |
| Q9JIP6    | Fzd2     | Frizzled-2                                                              | .                 | 2.445 | 1.981 | .       | 7     | 1     | N                  |
| Q61089    | Fzd6     | Frizzled-6                                                              | .                 | 2.109 | 2.063 | .       | 3     | 2     | Y                  |
| Q01721    | Gas1     | Growth arrest-specific protein 1                                        | .                 | 2.097 | 1.94  | .       | 13    | 1     | N                  |
| P21278    | Gna11    | Guanine nucleotide-binding protein subunit alpha-11                     | .                 | 1.23  | 2.484 | .       | 13    | 5     | N                  |
| P21279    | Gnaq     | Guanine nucleotide-binding protein G(q) subunit alpha                   | .                 | 1.437 | 1.747 | .       | 13    | 3     | N                  |
| Q9QZF2    | Gpc1     | Glypican-1                                                              | 4.95              | 1.844 | 1.79  | 2       | 65    | 27    | Y                  |
| Q9R087    | Gpc6     | Glypican-6                                                              | .                 | 1.62  | 2.485 | .       | 18    | 30    | N                  |
| Q6F3F9    | Gpr126   | G-protein coupled receptor 126                                          | 0.697             | 1.65  | 1.294 | 2       | 6     | 1     | Y                  |
| Q8K209    | Gpr56    | G-protein coupled receptor 56                                           | 0.413             | 1.635 | 1.337 | 7       | 13    | 7     | Y                  |
| G5E8C3    | Gprc5a   | G protein-coupled receptor, family C, group 5, member A                 | 2.202             | 1.576 | 1.283 | 20      | 5     | 4     | Y                  |
| P01899    | H2-D1    | H-2 class I histocompatibility antigen, D-B alpha chain                 | 1.653             | 1.038 | 1.356 | 36      | 213   | 251   | N                  |
| P03991    | H2-K1    | H-2 class I histocompatibility antigen, K-W28 alpha chain               | 1.515             | 1.123 | 1.479 | 46      | 118   | 192   | N                  |
| P01897    | H2-L     | H-2 class I histocompatibility antigen, L-D alpha chain                 | 1.434             | 1.05  | 1.539 | 34      | 188   | 214   | N                  |
| Q9JHJ8    | Icoslg   | ICOS ligand                                                             | .                 | 1.275 | 2.01  | .       | 22    | 11    | N                  |

| Accession | Gene    | Description                                                     | AK10965 | AK192       | AK196   | AK10965 | AK192 | AK196 | Human <sup>a</sup> |
|-----------|---------|-----------------------------------------------------------------|---------|-------------|---------|---------|-------|-------|--------------------|
|           |         |                                                                 | Ratio   | KRAS ON/OFF | MSEvent |         |       |       |                    |
| E9QNX9    | Igf1r   | Tyrosine-protein kinase receptor                                | 1.649   | 1.078       | 1.67    | 113     | 276   | 275   | Y                  |
| Q6ZQA6    | Igfs3   | Immunoglobulin superfamily member 3                             | 1.837   | 0.925       | 1.708   | 19      | 725   | 430   | Y                  |
| Q8R366    | Igfs8   | Immunoglobulin superfamily member 8                             | 1.684   | 0.861       | 1.452   | 90      | 622   | 461   | Y                  |
| Q80XZ4    | Il22ra1 | Interleukin-22 receptor subunit alpha-1                         | .       | 1.207       | 1.775   | .       | 51    | 10    | N                  |
| P16382    | Il4r    | Interleukin-4 receptor subunit alpha                            | .       | 1.614       | 2.462   | .       | 3     | 8     | N                  |
| P15208    | Insr    | Insulin receptor                                                | 2.182   | 1.028       | 1.502   | 59      | 260   | 365   | Y                  |
| Q99KW9    | Itfg1   | T-cell immunomodulatory protein                                 | 1.973   | 1.072       | 2.303   | 1       | 23    | 12    | Y                  |
| Q3V3R4    | Itga1   | Integrin alpha-1                                                | 1.466   | 0.95        | 1.443   | 69      | 135   | 114   | Y                  |
| Q62469    | Itga2   | Integrin alpha-2                                                | 2.523   | 1.053       | 1.802   | 375     | 2123  | 851   | Y                  |
| Q62470    | Itga3   | Integrin alpha-3                                                | 1.795   | .           | 1.649   | 455     | .     | 1833  | Y                  |
| P11688    | Itga5   | Integrin alpha-5                                                | 2.075   | 0.983       | 1.926   | 16      | 151   | 151   | Y                  |
| Q61739    | Itga6   | Isoform Alpha-6X1A of Integrin alpha-6                          | 2.502   | 1.269       | 2.254   | 269     | 2155  | 907   | Y                  |
| Q61738    | Itga7   | Isoform Alpha-7X2B of Integrin alpha-7                          | 1.839   | 0.807       | 1.69    | 8       | 169   | 41    | N                  |
| P43406    | Itgav   | Integrin alpha-V                                                | 1.509   | 1.116       | 2.029   | 232     | 3377  | 1120  | Y                  |
| P09055    | Itgb1   | Integrin beta-1                                                 | 2.155   | 0.96        | 1.717   | 489     | 7015  | 3679  | Y                  |
| O54890    | Itgb3   | Integrin beta-3                                                 | 2.2     | 1.156       | 2.175   | 41      | 676   | 318   | Y                  |
| A2A863    | Itgb4   | Isoform 2 of Integrin beta-4                                    | 2.592   | 1.184       | 2.25    | 242     | 2476  | 813   | Y                  |
| O70309    | Itgb5   | Integrin beta-5                                                 | 1.385   | 1.046       | 1.581   | 57      | 352   | 248   | Y                  |
| Q9J159    | Jam2    | Junctional adhesion molecule B                                  | .       | 2.001       | 3.533   | .       | 13    | 25    | N                  |
| Q80W68    | Kirrel  | Kin of IRRE-like protein 1                                      | 1.114   | 1.258       | 1.77    | 21      | 259   | 60    | Y                  |
| P20937    | Klra1   | T-cell surface glycoprotein YE1/48                              | .       | 1.215       | 1.701   | .       | 19    | 17    | N                  |
| P11438    | Lamp1   | Lysosome-associated membrane glycoprotein 1                     | 1.046   | 1.758       | 2.399   | 2       | 3     | 7     | Y                  |
| B2KGR2    | Lancl1  | LanC-like protein 1 (Fragment)                                  | .       | 2.707       | 3.087   | .       | 1     | 7     | N                  |
| P35951    | Ldlr    | Low-density lipoprotein receptor                                | 0.655   | 1.463       | 2.101   | 14      | 313   | 168   | Y                  |
| P50284    | Ltbr    | Tumor necrosis factor receptor superfamily member 3             | 1.619   | 1.126       | 2.747   | 1       | 116   | 9     | Y                  |
| F8VQL0    | Met     | Hepatocyte growth factor receptor                               | 1.558   | 1.066       | 1.502   | 30      | 213   | 148   | Y                  |
| B7ZCL8    | Mpp1    | 55 kDa erythrocyte membrane protein                             | .       | 1.281       | 1.373   | .       | 13    | 36    | N                  |
| Q3TEW6    | Mpz1    | Myelin protein zero-like protein 1                              | 1.813   | 1.302       | 1.687   | 9       | 69    | 26    | Y                  |
| Q91WI4    | Mpz2    | Epithelial V-like antigen 1                                     | .       | 1.209       | 1.642   | .       | 34    | 9     | N                  |
| Q02496    | Muc1    | Mucin-1                                                         | 1.571   | 0.859       | 1.358   | 6       | 64    | 44    | Y                  |
| E9QB01    | Ncam1   | Neural cell adhesion molecule 1                                 | 1.135   | 1.583       | 1.685   | 257     | 915   | 21    | Y                  |
| P57716    | Ncstn   | Nicastrin                                                       | 1.945   | 1.267       | 2.119   | 35      | 223   | 87    | Y                  |
| Q9CR95    | Necap1  | Adaptin ear-binding coat-associated protein 1                   | .       | 2.251       | 2.314   | .       | 2     | 2     | N                  |
| E9QK04    | Neo1    | Neogenin                                                        | 3.283   | 1.711       | 1.606   | 115     | 1203  | 1001  | Y                  |
| G5E8J0    | Notch2  | Neurogenic locus notch homolog protein 2                        | 0.53    | 1.38        | 2.218   | 2       | 110   | 96    | Y                  |
| Q61503    | Nt5e    | 5'-nucleotidase                                                 | 1.269   | 1.351       | 1.759   | 48      | 421   | 594   | Y                  |
| Q9EQ09    | Olr1    | Oxidized low-density lipoprotein receptor 1                     | .       | 2.357       | 2.261   | .       | 4     | 4     | N                  |
| Q8BWG9    | Orai1   | Calcium release-activated calcium channel protein 1             | 1.346   | .           | 1.82    | 1       | 9     | 2     | N                  |
| Q9JK83    | Pard6b  | Isoform 2 of Partitioning defective 6 homolog beta              | 1.513   | 1.227       | 0.939   | 3       | 2     | 5     | N                  |
| Q2YFS3    | Pilra   | Isoform 2 of Paired immunoglobulin-like type 2 receptor alpha   | 5.878   | 1.541       | 2.709   | 9       | 63    | 56    | N                  |
| P35456    | Plaur   | Urokinase plasminogen activator surface receptor                | 2.504   | 1.38        | 2.756   | 21      | 137   | 35    | Y                  |
| Q9R0M4    | Podxl   | Podocalyxin                                                     | 3.351   | 1.156       | 1.971   | 1       | 39    | 26    | Y                  |
| Q99JY8    | Ppap2b  | Lipid phosphate phosphohydrolase 3                              | 5.864   | 1.113       | 1.341   | 4       | 59    | 17    | N                  |
| G3XA61    | Ppap2c  | Lipid phosphate phosphohydrolase 2                              | 1.773   | 1.033       | 2.291   | 1       | 8     | 2     | Y                  |
| Q64695    | Procr   | Endothelial protein C receptor                                  | 2.853   | 1.178       | 1.812   | 31      | 142   | 121   | Y                  |
| Q9WV91    | Ptgrn   | Prostaglandin F2 receptor negative regulator                    | 1.433   | 0.928       | 1.659   | 303     | 1567  | 835   | Y                  |
| Q91V35    | Ptpra   | Protein tyrosin phosphatase receptor type alpha                 | 1.752   | 1.256       | 1.806   | 13      | 41    | 9     | Y                  |
| P49446-3  | Ptpre   | Isoform 3 of Receptor-type tyrosine-protein phosphatase epsilon | .       | 1.432       | 1.441   | .       | 47    | 1     | N                  |
| A2A8L5    | Ptprf   | Receptor-type tyrosine-protein phosphatase F                    | 2.759   | 0.966       | 1.627   | 56      | 716   | 310   | Y                  |
| F8VQD7    | Ptprg   | Receptor-type tyrosine-protein phosphatase gamma                | 3.708   | 1.156       | 1.694   | 12      | 224   | 77    | Y                  |
| P35822    | Ptprk   | Receptor-type tyrosine-protein phosphatase kappa                | 1.416   | 0.902       | 1.587   | 87      | 572   | 419   | Y                  |
| B0V2N1    | Ptprs   | Receptor-type tyrosine-protein phosphatase S                    | .       | 1.209       | 2.001   | .       | 403   | 197   | Y                  |
| B9EKR1    | Ptprz1  | Protein Ptpz1                                                   | .       | 1.506       | 1.567   | .       | 10    | 4     | N                  |
| Q8K094    | Pvr     | Poliovirus receptor                                             | 2.368   | 0.951       | 1.849   | 99      | 241   | 276   | Y                  |
| Q9JKF6    | Pvrl1   | Poliovirus receptor-related protein 1                           | 1.068   | 1.754       | 1.95    | 12      | 14    | 8     | Y                  |
| P32507    | Pvrl2   | Poliovirus receptor-related protein 2                           | 1.786   | 1.251       | 2.46    | 29      | 155   | 139   | Y                  |
| Q9JLB9    | Pvrl3   | Poliovirus receptor-related protein 3                           | .       | 1.467       | 1.955   | .       | 25    | 46    | Y                  |
| Q3TEG7    | Rab2b   | Ras-related protein Rab-2B                                      | .       | 1.303       | 4.47    | .       | 105   | 57    | N                  |
| O08602    | Raet1a  | Retinoic acid early-inducible protein 1-alpha                   | .       | 1.284       | 1.811   | .       | 188   | 85    | N                  |
| O08603    | Raet1b  | Retinoic acid early-inducible protein 1-beta                    | 2.371   | 1.137       | 1.748   | 10      | 189   | 92    | N                  |
| O08604    | Raet1c  | Retinoic acid early-inducible protein 1-gamma                   | 3.062   | 1.338       | 1.426   | 9       | 161   | 76    | N                  |
| P61226    | Rap2b   | Ras-related protein Rap-2b                                      | .       | 1.359       | 2.269   | .       | 16    | 8     | N                  |
| Q77Q33    | Rgmb    | RGM domain family member B                                      | 3.114   | 1.454       | 2.072   | 6       | 54    | 16    | N                  |
| E9PUN5    | Ror2    | Tyrosine-protein kinase transmembrane receptor ROR2             | 1.823   | 1.033       | 2.106   | 8       | 2     | 13    | N                  |
| Q61009    | Scarb1  | Scavenger receptor class B member 1                             | 1.329   | 1.303       | 2.324   | 2       | 23    | 16    | Y                  |
| O35114    | Scarb2  | Lysosome membrane protein 2                                     | 0.806   | 2.165       | 2.295   | 2       | 6     | 14    | Y                  |
| P18828    | Sdc1    | Isoform 2 of Syndecan-1                                         | 4.895   | 1.21        | 2.486   | 4       | 59    | 52    | Y                  |
| O35988    | Sdc4    | Syndecan-4                                                      | 7.446   | 2.416       | 2.314   | 2       | 9     | 19    | N                  |
| Q62178    | Sema4a  | Semaphorin-4A                                                   | .       | 1.23        | 2.532   | .       | 100   | 140   | N                  |
| Q62179    | Sema4b  | Semaphorin-4B                                                   | 4.373   | 1.312       | 3.331   | 11      | 284   | 155   | Y                  |
| Q64151    | Sema4c  | Semaphorin-4C                                                   | 2.54    | 1.142       | 1.779   | 1       | 61    | 46    | Y                  |
| O09126    | Sema4d  | Semaphorin-4D                                                   | 3.459   | 0.876       | 1.723   | 1       | 25    | 45    | Y                  |
| O54951    | Sema6b  | Semaphorin-6B                                                   | .       | 1.465       | 2.251   | .       | 10    | 4     | N                  |
| Q76KF0    | Sema6d  | Isoform 2 of Semaphorin-6D                                      | .       | 1.337       | 2.52    | .       | 205   | 62    | N                  |
| Q9QUR8    | Sema7a  | Semaphorin-7A                                                   | .       | 1.454       | 1.315   | .       | 83    | 10    | Y                  |
| Q78IQ7    | Slc39a4 | Zinc transporter ZIP4                                           | 9.648   | 0.627       | 1.585   | 12      | 321   | 262   | N                  |

| Accession | Gene      | Description                                           | AK10965           | AK192 | AK196 | AK10965 | AK192 | AK196 | Human <sup>a</sup> |
|-----------|-----------|-------------------------------------------------------|-------------------|-------|-------|---------|-------|-------|--------------------|
|           |           |                                                       | Ratio KRAS ON/OFF |       |       | MSEvent |       |       |                    |
| P10852    | Slc3a2    | 4F2 cell-surface antigen heavy chain                  | 1.464             | 0.915 | 1.478 | 161     | 705   | 381   | Y                  |
| Q6X893    | Slc44a1   | Choline transporter-like protein 1                    | 1.593             | .     | 2.25  | 28      | .     | 8     | Y                  |
| Q9WTR6    | Slc7a11   | Cystine/glutamate transporter                         | 2.991             | 1.169 | 1.854 | 1       | 11    | 5     | N                  |
| Q9Z127    | Slc7a5    | Large neutral amino acids transporter small subunit 1 | 1.424             | 1.004 | 1.797 | 23      | 47    | 20    | Y                  |
| Q8BGK6    | Slc7a6    | Y+L amino acid transporter 2                          | 1.377             | 1.099 | 2.458 | 17      | 8     | 5     | N                  |
| Q61165    | Slc9a1    | Sodium/hydrogen exchanger 1                           | .                 | 1.282 | 1.93  | .       | 3     | 1     | Y                  |
| Q9JHL1    | Slc9a3r2  | Na(+)/H(+) exchange regulatory cofactor NHE-RF2       | 1.472             | 0.927 | 1.582 | 11      | 56    | 63    | N                  |
| O09044    | Snap23    | Synaptosomal-associated protein 23                    | 0.637             | 1.285 | 1.322 | 22      | 48    | 38    | N                  |
| Q9CWR7    | Steap1    | Metalloreductase STEAP1                               | 2.076             | 0.861 | 1.265 | 2       | 55    | 6     | Y                  |
| Q99JB2    | Stoml2    | Stomatin-like protein 2                               | 1.241             | 1.532 | 0.551 | 6       | 15    | 46    | N                  |
| Q62351    | Tfrc      | Transferrin receptor protein 1                        | 3.169             | 0.875 | 1.947 | 29      | 853   | 207   | Y                  |
| Q62312    | Tgfb2     | Isoform RII-1 of TGF-beta receptor type-2             | .                 | 1.474 | 1.894 | .       | 24    | 9     | N                  |
| Q9QUK6    | Tlr4      | Toll-like receptor 4                                  | .                 | 1.282 | 1.982 | .       | 8     | 8     | N                  |
| Q64302    | Tm4sf1    | Transmembrane 4 L6 family member 1                    | 1.549             | .     | 2.047 | 2       | .     | 2     | N                  |
| Q9D771    | Tmem206   | Transmembrane protein 206                             | 1.709             | 1.052 | 1.816 | 2       | 24    | 5     | N                  |
| Q9QZM4    | Tnfrsf10b | Tumor necrosis factor receptor superfamily member 10B | 4.172             | 0.93  | 2.346 | 14      | 334   | 225   | Y                  |
| E9PZT5    | Tnfrsf12a | Tumor necrosis factor receptor superfamily member 12A | .                 | 1.96  | 2.957 | .       | 3     | 5     | N                  |
| P25118    | Tnfrsf1a  | Tumor necrosis factor receptor superfamily member 1A  | .                 | 1.661 | 1.99  | .       | 48    | 24    | N                  |
| Q9ER62    | Tnfrsf22  | Tumor necrosis factor receptor superfamily member 22  | 2.915             | 1.332 | 2.253 | 1       | 140   | 13    | N                  |
| Q9ER63    | Tnfrsf23  | Tumor necrosis factor receptor superfamily member 23  | .                 | 1.678 | 2.834 | .       | 74    | 6     | N                  |
| P41274    | Tnfsf9    | Tumor necrosis factor ligand superfamily member 9     | 10.969            | 1.353 | 2.533 | 4       | 140   | 116   | N                  |
| Q9Z0L0    | Tpbp      | Trophoblast glycoprotein                              | 1.929             | 1.197 | 1.918 | 34      | 281   | 65    | Y                  |
| Q8QZY6    | Tspan14   | Tetraspanin-14                                        | 1.698             | 1.451 | 1.816 | 3       | 13    | 3     | N                  |
| Q8R3G9    | Tspan8    | Tetraspanin-8                                         | 1.706             | 1.552 | 2.415 | 11      | 14    | 5     | Y                  |
| D3YXN7    | Tspan9    | Tetraspanin-9 (Fragment)                              | 1.498             | 1.554 | .     | 3       | 1     | .     | N                  |
| P55144    | Tyro3     | Isoform 1 of Tyrosine-protein kinase receptor TYRO3   | .                 | 1.413 | 1.99  | .       | 1     | 5     | N                  |
| Q8HWA3    | Ubp1      | Protein Ubp1                                          | 3.431             | 1.799 | 1.174 | 8       | 68    | 1     | N                  |
| P63044    | Vamp2     | Vesicle-associated membrane protein 2                 | .                 | 1.339 | 1.557 | .       | 18    | 10    | N                  |
| P63024    | Vamp3     | Vesicle-associated membrane protein 3                 | .                 | 1.297 | 1.675 | .       | 26    | 10    | N                  |
| Q9CZT5    | Vasn      | Vasorin                                               | 1.783             | 1.701 | 3.395 | 1       | 20    | 18    | Y                  |
| Q9Z0K8    | Vnn1      | Pantetheinase                                         | 1.361             | 1.418 | 1.557 | 361     | 829   | 467   | Y                  |
| Q9D2J4    | Vsig1     | V-set and immunoglobulin domain-containing protein 1  | 1.516             | 1.081 | 2.202 | 63      | 484   | 1306  | N                  |
| B1AVD1    | Xpnpep2   | Protein Xpnpep2                                       | 1.201             | 1.74  | .     | 6       | 14    | .     | N                  |
| Q5Y5T1    | Zdhhc20   | Isoform 2 of Probable palmitoyltransferase ZDHHC20    | 1.799             | 0.887 | 1.513 | 4       | 13    | 9     | N                  |
| Q62523    | Zyx       | Zyxin                                                 | .                 | 1.706 | 2.189 | .       | 2     | 3     | N                  |
| O35632    | Hyal2     | Hyaluronidase-2                                       | 1.684             | 1.249 | 1.798 | 2       | 10    | 22    | Y                  |
| P07141    | Csf1      | Isoform 2 of Macrophage colony-stimulating factor 1   | 1.143             | 1.232 | 1.856 | 34      | 3     | 6     | Y                  |
| P53690    | Mmp14     | Matrix metalloproteinase-14                           | 1.46              | 1.35  | 2.563 | 7       | 22    | 2     | Y                  |
| Q5FWI3    | Tmem2     | Transmembrane protein 2                               | 2.547             | 1.135 | 1.377 | 19      | 50    | 23    | Y                  |
| Q61468    | Msln      | Mesothelin                                            | 1.739             | 1.394 | 2.136 | 106     | 625   | 266   | Y                  |
| Q8C0Z1    | Itfg3     | Protein ITFG3                                         | 1.452             | 1.061 | 1.543 | 44      | 42    | 63    | Y                  |
| Q8C129    | Lnpep     | Leucyl-cystinyl aminopeptidase                        | 1.93              | 0.978 | 1.985 | 32      | 38    | 49    | Y                  |
| Q9CYN9    | Atp6ap2   | Renin receptor                                        | 1.924             | 0.826 | 1.521 | 3       | 5     | 3     | Y                  |
| A2A699    | Fam171a2  | Protein FAM171A2                                      | .                 | 1.262 | 2.408 | .       | 13    | 1     | Y                  |
| Q8VDZ4    | Zdhhc5    | Palmitoyltransferase ZDHHC5                           | .                 | 1.376 | 2.444 | .       | 11    | 12    | Y                  |
| Q9WU03-2  | Spint2    | Isoform 2 of Kunitz-type protease inhibitor 2         | 1.657             | 1.106 | 2.151 | 2       | 8     | 3     | Y                  |

Footnotes: <sup>a</sup>Enriched in human PDAC

Supplementary Table2 Kras down-regulated surfaceome gene list

| Accession | Gene     | Description                                                     | AK10965 | AK192       | AK196 | AK10965 | AK192 | AK196 |
|-----------|----------|-----------------------------------------------------------------|---------|-------------|-------|---------|-------|-------|
|           |          |                                                                 | Ratio   | KRAS ON/OFF |       | MSEvent |       |       |
| Q99JY9    | Actr3    | Actin-related protein 3                                         | 0.662   | 0.977       | 0.393 | 12      | 208   | 200   |
| O88398    | Avil     | Advillin                                                        | .       | 0.713       | 0.148 | .       | 122   | 75    |
| P49817    | Cav1     | Caveolin-1                                                      | 0.685   | 0.999       | 0.465 | 30      | 30    | 9     |
| P59242-2  | Cgn      | Isoform 2 of Cingulin                                           | .       | 0.69        | 0.247 | .       | 30    | 31    |
| Q6AW69    | Cgnl1    | Isoform 5 of Cingulin-like protein 1                            | .       | 0.68        | 0.263 | .       | 8     | 2     |
| O35427    | Crcp     | DNA-directed RNA polymerase III subunit RPC9                    | .       | 0.802       | 0.397 | .       | 2     | 9     |
| P26231    | Ctnna1   | Catenin alpha-1                                                 | 0.729   | 0.795       | 1.024 | 99      | 658   | 662   |
| Q60598    | Ctnn     | Src substrate cortactin                                         | 1.057   | 0.736       | 0.111 | 39      | 63    | 87    |
| E9PX48    | Dock7    | Dedicator of cytokinesis protein 7                              | .       | 0.688       | 0.368 | .       | 27    | 4     |
| O70318    | Epb4112  | Band 4.1-like protein 2                                         | 0.82    | 0.94        | 0.53  | 5       | 210   | 45    |
| Q08509    | Eps8     | Epidermal growth factor receptor kinase substrate 8             | .       | 0.705       | 0.531 | .       | 23    | 48    |
| Q07797    | Lgals3bp | Galectin-3-binding protein                                      | 2.361   | 0.789       | 0.73  | 5       | 65    | 58    |
| O55022    | Pgrmc1   | Membrane-associated progesterone receptor component 1           | 0.322   | 0.943       | 0.716 | 35      | 52    | 40    |
| Q9JJ00    | Plscr1   | Phospholipid scramblase 1                                       | 0.456   | 0.664       | 1.293 | 6       | 11    | 5     |
| Q31125    | Slc39a7  | Zinc transporter SLC39A7                                        | .       | 0.826       | 0.473 | .       | 4     | 1     |
| Q3UTJ2    | Sorbs2   | Sorbin and SH3 domain-containing protein 2                      | .       | 0.237       | 0.172 | .       | 113   | 65    |
| Q62261    | Sptbn1   | Spectrin beta chain, non-erythrocytic 1                         | 0.115   | 1.168       | 0.063 | 16      | 1541  | 1151  |
| E9Q983    | Svil     | Supervillin                                                     | .       | 0.789       | 0.107 | .       | 12    | 8     |
| Q5SPX8    | Tbc1d10a | TBC1 domain family member 10A                                   | .       | 0.776       | 0.609 | .       | 3     | 3     |
| P39447    | Tjp1     | Tight junction protein ZO-1                                     | .       | 0.601       | 0.658 | .       | 172   | 129   |
| Q9Z0U1    | Tjp2     | Tight junction protein ZO-2                                     | 0.773   | 0.809       | 1.03  | 1       | 209   | 155   |
| Q8BTV1    | Tusc3    | Tumor suppressor candidate 3                                    | .       | 0.827       | 0.104 | .       | 8     | 1     |
| Q9WV55    | Vapa     | Vesicle-associated membrane protein-associated protein A        | 0.388   | 0.946       | 0.445 | 71      | 496   | 190   |
| Q8BH80    | Vapb     | Vesicle-associated membrane protein, associated protein B and C | 0.491   | 1.045       | 0.791 | 19      | 213   | 128   |
| Q8BH43    | Wasf2    | Wiskott-Aldrich syndrome protein family member 2                | .       | 0.77        | 0.436 | .       | 19    | 14    |

Supplementary Table 3 Ingenuity pathway analysis of Kras\* regulated surfaceome

| pathway                                                                   | score | ratio | rank_Kras_S <sup>d</sup> | rank_mm10_S <sup>d</sup> | pct <sup>a</sup> | pctBkg <sup>b</sup> | enrich <sup>c</sup> | Fisher   |
|---------------------------------------------------------------------------|-------|-------|--------------------------|--------------------------|------------------|---------------------|---------------------|----------|
| Caveolar-mediated Endocytosis Signaling                                   | 17.4  | 0.23  | 1                        | 15                       | 12.6             | 1.25                | 10.08               | 1.03E-10 |
| Virus Entry via Endocytic Pathways                                        | 12.1  | 0.14  | 2                        | 35                       | 11.02            | 1.31                | 8.41                | 1.15E-08 |
| Axonal Guidance Signaling                                                 | 11.2  | 0.05  | 3                        | 6                        | 18.9             | 5.29                | 3.57                | 1.46E-07 |
| Aggrin Interactions at Neuromuscular Junction                             | 10.4  | 0.16  | 4                        | 57                       | 8.66             | 0.88                | 9.84                | 1.24E-07 |
| Sertoli Cell-Sertoli Cell Junction Signaling                              | 9.86  | 0.08  | 5                        | 30                       | 11.81            | 1.95                | 6.06                | 1.32E-07 |
| Integrin Signaling                                                        | 9.55  | 0.07  | 6                        | 38                       | 12.6             | 2.16                | 5.83                | 7.29E-08 |
| Paxillin Signaling                                                        | 8.03  | 0.10  | 7                        | 34                       | 8.66             | 1.41                | 6.14                | 6.30E-06 |
| Ephrin Receptor Signaling                                                 | 7.98  | 0.07  | 8                        | 10                       | 10.24            | 2.56                | 4                   | 4.95E-05 |
| Role of Tissue Factor in Cancer                                           | 7.68  | 0.09  | 9                        | 98                       | 8.66             | 1.04                | 8.33                | 5.20E-07 |
| Tight Junction Signaling                                                  | 7.22  | 0.07  | 10                       | 22                       | 9.45             | 1.95                | 4.85                | 1.89E-05 |
| RhoGDI Signaling                                                          | 7.05  | 0.07  | 11                       | 13                       | 9.45             | 2.22                | 4.26                | 5.81E-05 |
| Leukocyte Extravasation Signaling                                         | 7.01  | 0.06  | 12                       | 21                       | 10.24            | 2.32                | 4.41                | 2.01E-05 |
| NF- $\kappa$ B Activation by Viruses                                      | 6.94  | 0.11  | 13                       | 60                       | 7.09             | 0.98                | 7.23                | 1.47E-05 |
| Granulocyte Adhesion and Diapedesis                                       | 6.94  | 0.07  | 14                       | 9                        | 9.45             | 2.59                | 3.65                | 0.00022  |
| PTEN Signaling                                                            | 6.74  | 0.08  | 15                       | 23                       | 7.87             | 1.55                | 5.08                | 6.76E-05 |
| Germ Cell-Sertoli Cell Junction Signaling                                 | 6.13  | 0.06  | 16                       | 137                      | 8.66             | 1.18                | 7.34                | 1.41E-06 |
| Epithelial Adherens Junction Signaling                                    | 5.91  | 0.07  | 17                       | 74                       | 7.87             | 1.31                | 6.01                | 1.99E-05 |
| Agranulocyte Adhesion and Diapedesis                                      | 5.75  | 0.06  | 18                       | 31                       | 8.66             | 2.02                | 4.29                | 0.00011  |
| Regulation of the Epithelial-Mesenchymal Transition Pathway               | 5.75  | 0.06  | 19                       | 92                       | 8.66             | 1.48                | 5.85                | 9.22E-06 |
| PCP pathway                                                               | 5.69  | 0.11  | 20                       | 86                       | 5.51             | 0.67                | 8.22                | 7.41E-05 |
| Reelin Signaling in Neurons                                               | 5.61  | 0.09  | 21                       | 110                      | 6.3              | 0.81                | 7.78                | 2.95E-05 |
| Molecular Mechanisms of Cancer                                            | 5.58  | 0.04  | 22                       | 89                       | 11.81            | 2.59                | 4.56                | 3.06E-06 |
| Signaling by Rho Family GTPases                                           | 5.4   | 0.05  | 23                       | 24                       | 9.45             | 2.53                | 3.74                | 0.00017  |
| Macropinocytosis Signaling                                                | 4.96  | 0.09  | 24                       | 65                       | 5.51             | 0.91                | 6.05                | 0.00035  |
| Clastrin-mediated Endocytosis Signaling                                   | 4.75  | 0.05  | 25                       | 115                      | 7.87             | 1.41                | 5.58                | 3.45E-05 |
| HER-2 Signaling in Breast Cancer                                          | 4.72  | 0.08  | 26                       | 77                       | 5.51             | 0.88                | 6.26                | 0.00029  |
| NF- $\kappa$ B Signaling                                                  | 4.28  | 0.05  | 27                       | 37                       | 7.09             | 1.89                | 3.75                | 0.00113  |
| STAT3 Pathway                                                             | 4.2   | 0.08  | 28                       | 28                       | 4.72             | 1.11                | 4.25                | 0.00453  |
| Role of Osteoblasts, Osteoclasts and Chondrocytes in Rheumatoid Arthritis | 4.15  | 0.04  | 29                       | 100                      | 7.87             | 1.72                | 4.58                | 0.00014  |

Footnotes: <sup>a</sup>Percent of pathway related genes in SILAC analysis

<sup>b</sup>Percent of pathway genes in all mouse plasma membrane genes (mm10)

<sup>c</sup>pct/pctBkg

<sup>d</sup>Surfaceome

Supplementary Table 4 Screen summarization

| Gene      | LogP    |       |       | Rank    |       |       | No._hits <sup>a</sup> |
|-----------|---------|-------|-------|---------|-------|-------|-----------------------|
|           | AK10965 | AK192 | AK196 | AK10965 | AK192 | AK196 |                       |
| Tfrc      | -2.74   | -2.82 | -1.73 | 2       | 3     | 20    | 3                     |
| Notch1    | -2.60   | -2.85 | -2.30 | 3       | 2     | 9     | 3                     |
| Itgb4     | -1.60   | -2.15 | -3.21 | 22      | 9     | 2     | 3                     |
| ErbB3     | -1.32   | -1.35 | -3.19 | 38      | 45    | 3     | 3                     |
| Adgrg1    | -1.40   | -1.44 | -2.78 | 33      | 39    | 4     | 3                     |
| Myof      | -1.78   | -2.27 | -2.18 | 15      | 6     | 11    | 3                     |
| Tspan15   | -2.10   | -2.05 | -2.03 | 11      | 15    | 14    | 3                     |
| Cd274     | -1.62   | -2.12 | -1.35 | 20      | 11    | 37    | 3                     |
| Cd99      | -1.85   | -1.57 | -1.70 | 13      | 29    | 21    | 3                     |
| Sdc1      | -1.60   | -1.52 | -1.86 | 21      | 31    | 16    | 3                     |
| Flrt3     | -1.44   | -1.34 | -1.53 | 30      | 46    | 27    | 3                     |
| F3        | -2.87   | -2.18 | -1.24 | 1       | 8     | 40    | 2                     |
| Kras      | -2.42   | -4.33 | -0.77 | 4       | 1     | 86    | 2                     |
| Gpr107    | -0.84   | -1.40 | -3.61 | 88      | 41    | 1     | 2                     |
| Epha4     | -1.08   | -2.66 | -1.48 | 58      | 4     | 30    | 2                     |
| Nt5E      | -2.41   | -1.69 | -0.99 | 5       | 25    | 59    | 2                     |
| Sema4C    | -2.38   | -0.65 | -1.86 | 6       | 95    | 17    | 2                     |
| Pvr13     | -1.58   | -0.80 | -2.43 | 23      | 80    | 6     | 2                     |
| Itgb1     | -0.86   | -1.49 | -2.40 | 85      | 32    | 7     | 2                     |
| Sema4D    | -1.28   | -1.63 | -2.35 | 43      | 28    | 8     | 2                     |
| Itfg1     | -2.17   | -1.48 | -0.61 | 9       | 37    | 108   | 2                     |
| Igsf3     | -1.85   | -1.64 | -0.79 | 14      | 27    | 83    | 2                     |
| Insr      | -1.24   | -2.06 | -1.69 | 46      | 14    | 22    | 2                     |
| Vnn1      | -0.90   | -2.00 | -1.35 | 76      | 16    | 36    | 2                     |
| Tnfrsf10B | -1.69   | -1.49 | -0.70 | 17      | 33    | 98    | 2                     |
| Slc3A2    | -1.42   | -1.99 | -1.26 | 31      | 17    | 39    | 2                     |
| Plaur     | -0.70   | -1.72 | -1.79 | 99      | 24    | 18    | 2                     |
| Cdh2      | -1.64   | -0.73 | -1.51 | 19      | 85    | 29    | 2                     |
| Vasn      | -1.31   | -1.88 | -1.16 | 41      | 21    | 43    | 2                     |
| Ptptra    | -1.57   | -1.37 | -1.12 | 25      | 44    | 45    | 2                     |
| Mst1R     | -1.55   | -1.57 | -0.69 | 26      | 30    | 99    | 2                     |
| Pvr11     | -0.75   | -1.40 | -1.54 | 92      | 42    | 26    | 2                     |
| Cd99L2    | -1.48   | -1.27 | -1.40 | 28      | 49    | 35    | 2                     |
| Itga3     | -0.10   | -1.44 | -1.48 | 145     | 40    | 31    | 2                     |
| Alcam     | -1.41   | -1.09 | -1.47 | 32      | 63    | 32    | 2                     |
| Ly75      | -1.32   | -1.48 | -1.23 | 40      | 34    | 41    | 2                     |
| Itfg3     | -0.87   | -0.55 | -2.51 | 81      | 110   | 5     | 1                     |
| Atp6Ap2   | -0.75   | -2.29 | -0.99 | 93      | 5     | 58    | 1                     |
| Ddr1      | -2.33   | -0.57 | -0.80 | 7       | 105   | 81    | 1                     |
| Notch2    | -0.94   | -2.23 | -0.80 | 71      | 7     | 79    | 1                     |
| Gpc4      | -2.24   | -1.27 | -0.58 | 8       | 48    | 114   | 1                     |
| Met       | -2.12   | -1.10 | -0.80 | 10      | 62    | 80    | 1                     |
| Itgb5     | -0.92   | -2.12 | -0.45 | 75      | 10    | 126   | 1                     |
| Msln      | -0.86   | -0.63 | -2.24 | 84      | 98    | 10    | 1                     |
| Cdh17     | -2.04   | -1.06 | -1.00 | 12      | 65    | 55    | 1                     |

| Gene     | LogP    |       |       | Rank    |       |       | No._hits <sup>a</sup> |
|----------|---------|-------|-------|---------|-------|-------|-----------------------|
|          | AK10965 | AK192 | AK196 | AK10965 | AK192 | AK196 |                       |
| Slc44A1  | -1.14   | -2.12 | -0.63 | 52      | 12    | 107   | 1                     |
| ErbB2    | -0.52   | -0.71 | -2.14 | 112     | 89    | 12    | 1                     |
| Glipr1   | -1.08   | -1.21 | -2.09 | 57      | 53    | 13    | 1                     |
| Itgb3    | -0.88   | -2.11 | -1.00 | 80      | 13    | 57    | 1                     |
| Atp1A1   | -0.42   | -0.83 | -1.89 | 119     | 78    | 15    | 1                     |
| Epha7    | -1.71   | -0.70 | -0.78 | 16      | 90    | 84    | 1                     |
| Muc1     | -1.67   | -0.12 | -0.50 | 18      | 144   | 119   | 1                     |
| Itm2B    | -0.96   | -1.97 | -0.89 | 70      | 18    | 67    | 1                     |
| Itga5    | -1.01   | -0.84 | -1.75 | 68      | 77    | 19    | 1                     |
| Efnb2    | -0.48   | -1.97 | -0.59 | 114     | 19    | 112   | 1                     |
| Cpm      | -0.87   | -1.90 | -0.68 | 83      | 20    | 101   | 1                     |
| Itga6    | -0.48   | -1.87 | -0.29 | 115     | 22    | 137   | 1                     |
| Itga1    | -0.89   | -1.23 | -1.68 | 77      | 51    | 23    | 1                     |
| Adam9    | -0.09   | -1.78 | -0.75 | 147     | 23    | 89    | 1                     |
| Ldlr     | -1.57   | -1.01 | -1.08 | 24      | 68    | 49    | 1                     |
| App      | -0.55   | -1.20 | -1.62 | 108     | 54    | 24    | 1                     |
| Cd151    | -0.59   | -0.84 | -1.62 | 106     | 76    | 25    | 1                     |
| Ptprs    | -1.24   | -1.65 | -1.08 | 45      | 26    | 48    | 1                     |
| Csf1     | -1.52   | -1.17 | -1.07 | 27      | 56    | 50    | 1                     |
| Lamp1    | -1.23   | -0.95 | -1.52 | 47      | 71    | 28    | 1                     |
| Cd44     | -1.48   | -0.85 | -0.68 | 29      | 75    | 100   | 1                     |
| Slc9A1   | -0.35   | -1.15 | -1.43 | 123     | 58    | 33    | 1                     |
| Bcam     | -1.37   | -0.62 | -0.88 | 34      | 99    | 68    | 1                     |
| Dag1     | -1.05   | -0.38 | -1.43 | 63      | 123   | 34    | 1                     |
| Slc16A3  | -1.36   | -0.63 | -0.87 | 35      | 97    | 71    | 1                     |
| Ephb4    | -0.89   | -1.48 | -0.75 | 78      | 35    | 91    | 1                     |
| Ephb3    | -1.36   | -1.01 | -0.82 | 36      | 69    | 77    | 1                     |
| Spint2   | -0.57   | -1.48 | -1.07 | 107     | 36    | 51    | 1                     |
| Atp1B3   | -1.33   | -1.17 | -0.76 | 37      | 57    | 88    | 1                     |
| Prom1    | -1.12   | -1.45 | -0.19 | 55      | 38    | 142   | 1                     |
| Fam171A2 | -0.87   | -0.92 | -1.33 | 82      | 72    | 38    | 1                     |
| Thbd     | -1.32   | -0.37 | -0.65 | 39      | 125   | 103   | 1                     |
| Ltbr     | -1.07   | -1.40 | -0.86 | 59      | 43    | 73    | 1                     |
| Sema4B   | -0.12   | -1.34 | -0.64 | 144     | 47    | 104   | 1                     |
| Itga2    | -1.29   | -0.71 | -0.58 | 42      | 88    | 113   | 0                     |
| Tspan8   | -1.12   | -0.15 | -1.19 | 54      | 142   | 42    | 0                     |
| Cd276    | -1.27   | -0.73 | -0.60 | 44      | 86    | 111   | 0                     |
| Plxna1   | -1.18   | -0.60 | -1.14 | 50      | 100   | 44    | 0                     |
| Cd9      | -0.32   | -1.13 | -1.10 | 124     | 60    | 46    | 0                     |
| Podxl    | -0.92   | -0.41 | -1.09 | 74      | 119   | 47    | 0                     |
| Egfr     | -1.22   | -0.80 | -0.90 | 48      | 79    | 65    | 0                     |
| Atp1B1   | -1.20   | -0.71 | -0.36 | 49      | 87    | 133   | 0                     |
| Pvr      | -0.55   | -1.24 | -0.87 | 109     | 50    | 72    | 0                     |
| Igf1R    | -1.16   | -0.57 | -0.19 | 51      | 104   | 143   | 0                     |
| Ptprg    | -1.04   | -0.79 | -1.04 | 64      | 83    | 52    | 0                     |

| Gene    | LogP    |       |       | Rank    |       |       | No._hits <sup>a</sup> |
|---------|---------|-------|-------|---------|-------|-------|-----------------------|
|         | AK10965 | AK192 | AK196 | AK10965 | AK192 | AK196 |                       |
| Itgav   | -0.74   | -1.22 | -0.57 | 95      | 52    | 115   | 0                     |
| Vapa    | -1.14   | -0.40 | -0.34 | 53      | 120   | 135   | 0                     |
| Efnb1   | -0.88   | -0.37 | -1.03 | 79      | 124   | 53    | 0                     |
| Anpep   | -0.29   | -0.39 | -1.01 | 128     | 121   | 54    | 0                     |
| Pcdh7   | -0.52   | -1.20 | -0.71 | 111     | 55    | 97    | 0                     |
| Ece1    | -1.11   | -1.11 | -0.87 | 56      | 61    | 70    | 0                     |
| Tpbp    | -0.98   | -0.44 | -1.00 | 69      | 117   | 56    | 0                     |
| Adam10  | -0.50   | -1.13 | -0.75 | 113     | 59    | 90    | 0                     |
| Jag1    | -1.07   | -0.41 | -0.47 | 60      | 118   | 124   | 0                     |
| Cd14    | -0.84   | -0.68 | -0.96 | 89      | 91    | 60    | 0                     |
| Sema7A  | -1.06   | -0.36 | -0.72 | 61      | 127   | 94    | 0                     |
| Pcdh1   | -0.73   | -0.57 | -0.94 | 96      | 103   | 61    | 0                     |
| Mmp14   | -1.05   | -0.50 | -0.94 | 62      | 113   | 63    | 0                     |
| Cacna1l | -0.65   | -0.54 | -0.94 | 102     | 111   | 62    | 0                     |
| Steap1  | -0.71   | -1.07 | -0.88 | 98      | 64    | 69    | 0                     |
| Slc44A2 | -0.07   | -0.35 | -0.93 | 148     | 128   | 64    | 0                     |
| Scarb2  | -1.03   | -0.59 | -0.36 | 65      | 102   | 132   | 0                     |
| Agrn    | -1.03   | -0.56 | -0.63 | 66      | 107   | 106   | 0                     |
| Epcam   | -0.75   | -1.04 | -0.23 | 94      | 66    | 140   | 0                     |
| Cadm1   | -0.26   | -0.29 | -0.89 | 132     | 132   | 66    | 0                     |
| Slc7A5  | -1.02   | -1.03 | -0.50 | 67      | 67    | 120   | 0                     |
| Adam17  | -0.31   | -0.99 | -0.76 | 126     | 70    | 87    | 0                     |
| Epha2   | -0.94   | -0.34 | -0.60 | 72      | 129   | 110   | 0                     |
| F11R    | -0.93   | -0.66 | -0.61 | 73      | 92    | 109   | 0                     |
| Cdh5    | -0.64   | -0.88 | -0.37 | 103     | 73    | 130   | 0                     |
| Ctnn    | -0.76   | -0.80 | -0.85 | 91      | 81    | 74    | 0                     |
| Plxnb2  | -0.40   | -0.86 | -0.30 | 120     | 74    | 136   | 0                     |
| Neo1    | -0.84   | -0.64 | -0.84 | 87      | 96    | 75    | 0                     |
| Axl     | -0.45   | -0.76 | -0.83 | 116     | 84    | 76    | 0                     |
| Igsf8   | -0.20   | -0.60 | -0.82 | 138     | 101   | 78    | 0                     |
| Ncam1   | -0.86   | -0.79 | -0.73 | 86      | 82    | 92    | 0                     |
| Plxnd1  | -0.17   | -0.38 | -0.80 | 140     | 122   | 82    | 0                     |
| Gprc5A  | -0.13   | -0.05 | -0.78 | 143     | 148   | 85    | 0                     |
| Tmem2   | -0.80   | -0.21 | -0.53 | 90      | 137   | 118   | 0                     |
| Hyal2   | -0.61   | -0.66 | -0.55 | 104     | 93    | 116   | 0                     |
| Gpc1    | -0.38   | -0.65 | -0.73 | 122     | 94    | 93    | 0                     |
| Lnpep   | -0.30   | -0.56 | -0.72 | 127     | 106   | 95    | 0                     |
| Dsc2    | -0.16   | -0.16 | -0.71 | 141     | 141   | 96    | 0                     |
| Ptk7    | -0.73   | -0.55 | -0.40 | 97      | 109   | 129   | 0                     |
| Scarb1  | -0.67   | -0.56 | -0.63 | 100     | 108   | 105   | 0                     |
| Ptprf   | -0.67   | -0.36 | -0.65 | 101     | 126   | 102   | 0                     |
| Cxadr   | -0.60   | -0.12 | -0.42 | 105     | 145   | 128   | 0                     |
| Efna5   | -0.54   | -0.52 | -0.49 | 110     | 112   | 121   | 0                     |
| Ptprk   | -0.25   | -0.50 | -0.46 | 134     | 114   | 125   | 0                     |
| Lsr     | -0.15   | -0.47 | -0.22 | 142     | 115   | 141   | 0                     |



| Gene   | LogP    |       |       | Rank    |       |       | No._hits <sup>a</sup> |
|--------|---------|-------|-------|---------|-------|-------|-----------------------|
|        | AK10965 | AK192 | AK196 | AK10965 | AK192 | AK196 |                       |
| Ptgfrn | -0.23   | -0.47 | -0.13 | 137     | 116   | 146   | 0                     |
| Cdh1   | -0.43   | -0.24 | -0.08 | 117     | 136   | 148   | 0                     |
| Ppap2C | -0.42   | -0.32 | -0.54 | 118     | 131   | 117   | 0                     |
| Dcbld2 | -0.39   | -0.24 | -0.37 | 121     | 135   | 131   | 0                     |
| Procr  | -0.24   | -0.11 | -0.49 | 135     | 146   | 122   | 0                     |
| Pvrl2  | -0.23   | -0.20 | -0.47 | 136     | 138   | 123   | 0                     |
| Adgrg6 | -0.31   | -0.34 | -0.35 | 125     | 130   | 134   | 0                     |
| Fzd6   | -0.28   | -0.18 | -0.42 | 130     | 140   | 127   | 0                     |
| Antxr2 | -0.29   | -0.15 | -0.11 | 129     | 143   | 147   | 0                     |
| Kirrel | -0.26   | -0.19 | -0.24 | 131     | 139   | 139   | 0                     |
| Mpzl1  | -0.25   | -0.27 | -0.26 | 133     | 133   | 138   | 0                     |
| Ncstn  | -0.09   | -0.26 | -0.17 | 146     | 134   | 144   | 0                     |
| Zdhc5  | -0.18   | -0.05 | -0.14 | 139     | 147   | 145   | 0                     |

Footnotes: <sup>a</sup>Number of cell lines showing as positive hits

<sup>b</sup>Highlighted: meet the cut off threshold
